# Supplementary material
Source: PubMed Central journal article supplement (PMC5425153)

**Supplemental Table. Traditional Cox Proportional Hazards Models and Subdistribution Models for Association of Weight Change with Risk of Specific Fracture Types**

| Fracture Type                               | Weight Loss<br>≥10%<br>(N= 283) | Weight Loss<br>5% to <10%<br>(N= 742) | Stable Weight<br>(Loss or Gain <5%)<br>(N= 3,076) | Weight Gain ≥5%<br>(N= 422) |
|---------------------------------------------|---------------------------------|---------------------------------------|---------------------------------------------------|-----------------------------|
| <b>Hip fracture (n=170)</b>                 |                                 |                                       |                                                   |                             |
| Incidence rate per 1,000 person-years       | 8.02 (3.29-12.76)               | 4.92 (3.13-6.72)                      | 4.47 (3.64-5.29)                                  | 4.46 (1.86-7.06)            |
| Cox proportional model HR (95% CI)          | 1.62 (0.91-2.89)                | 1.16 (0.78-1.74)                      | 1.00 (referent)                                   | 1.05 (0.60-1.83)            |
| Subdistribution model HR (95% CI)           | 1.11 (0.62-2.00)                | 1.04 (0.69-1.56)                      | 1.00 (referent)                                   | 0.98 (0.56-1.70)            |
| <b>Clinical vertebral fractures (n=138)</b> |                                 |                                       |                                                   |                             |
| Incidence rate per 1,000 person-years       | 6.11 (2.23-10.00)               | 5.02 (3.22-6.83)                      | 3.45 (2.73-4.18)                                  | 2.97 (0.83- 5.12)           |
| Cox proportional model HR (95% CI)          | 1.68 (0.89-3.15)                | 1.49 (0.99-2.25)                      | 1.00 (referent)                                   | 0.86 (0.43-1.71)            |
| Subdistribution model HR (95% CI)           | 1.24 (0.66-2.33)                | 1.34 (0.89-2.03)                      | 1.00 (referent)                                   | 0.81 (0.41-1.60)            |
| <b>Pelvis fracture (n=52)</b>               |                                 |                                       |                                                   |                             |
| Incidence rate per 1,000 person-years       | 3.01 (0.30-5.71)                | 0.70 (0.07-1.34)                      | 1.40 (0.94-1.85)                                  | 1.68 (0.28-3.07)            |
| Cox proportional model HR (95% CI)          | 2.14 (0.84-5.48)                | 0.63 (0.25-1.60)                      | 1.00 (referent)                                   | 1.35 (0.57-3.20)            |

|                                   |                  |                  |                 |                  |
|-----------------------------------|------------------|------------------|-----------------|------------------|
| Subdistribution model HR (95% CI) | 1.46 (0.56-3.76) | 0.55 (0.22-1.39) | 1.00 (referent) | 1.25 (0.53-2.95) |
|-----------------------------------|------------------|------------------|-----------------|------------------|

---

Incident rates and hazards ratios adjusted for age

### Supplemental Figure 1. Participant Flow

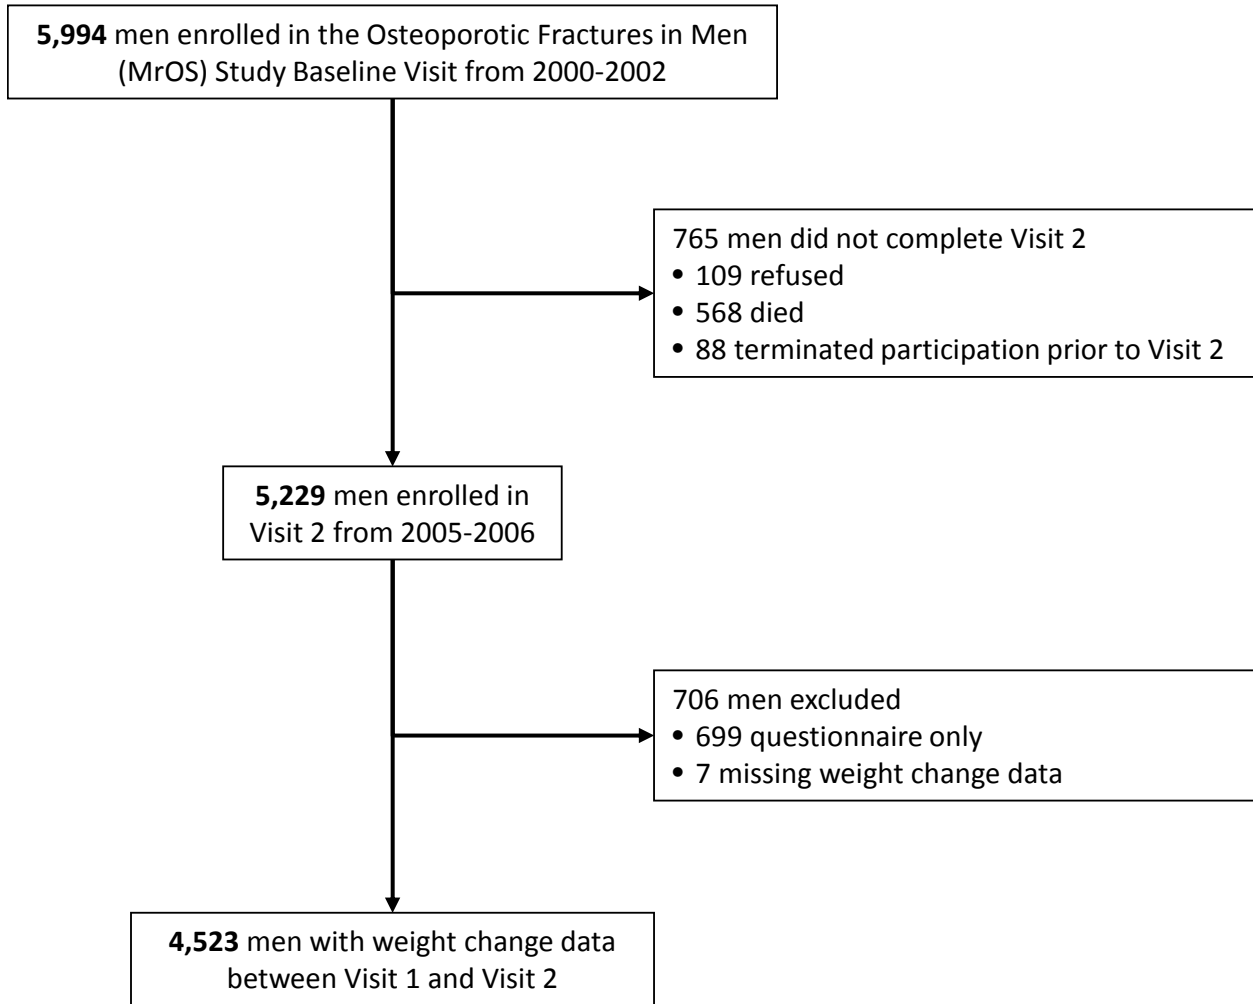

Supplement: NIHMS855992-supplement-supplement_1.pdf [file NIHMS855992-supplement-supplement_1.pdf]
